# Supplementary material for: Significantly lowered activation energy in proton conductor by Mg substitution in a layered Ni metal–organic framework
Source: Royal Society of Chemistry journal article supplement (doi:10.1039/d2dt00288d), 2022-01-01
Supplement: d2dt00288d1.pdf [file d2dt00288d1.pdf]

## Supporting Information

### **Significantly Lowered Activation Energy in Proton Conductor by Mg Substitution in a Layered Ni Metal– Organic Framework**

Bo Huang<sup>\*,a,b</sup>, Zhe Tan<sup>a</sup>

*<sup>a</sup>Institute of Chemical Engineering and Technology, Xi'an Jiaotong University, Innovation Harbour, Xi-xian  
New District, Xi'an 712000, China*

*<sup>b</sup>State Key Laboratory of Structural Chemistry, Fujian Institute of Research on the Structure of Matter,  
Chinese Academy of Sciences, Fuzhou, Fujian 350002, China*

\*Correspondence and requests for materials should be addressed to

B. Huang (email: bohuang@xjtu.edu.cn).

**Table S1** Elemental analysis results of H<sub>2</sub>DAB-Mg<sub>2</sub>(ox)<sub>3</sub>, H<sub>2</sub>DAB-Ni<sub>2</sub>(ox)<sub>3</sub> and H<sub>2</sub>DAB-MgNi(ox)<sub>3</sub>.

| Elem. Anal.                                             |                          | C %   | H %  | N %  | C / N |
|---------------------------------------------------------|--------------------------|-------|------|------|-------|
| H <sub>2</sub> DAB<br>MgNi(ox) <sub>3</sub>             | Calc (2H <sub>2</sub> O) | 25.02 | 3.77 | 5.83 | 4.29  |
|                                                         | Found                    | 24.86 | 3.84 | 5.78 | 4.30  |
| H <sub>2</sub> DAB<br>Ni <sub>2</sub> (ox) <sub>3</sub> | Calc (2H <sub>2</sub> O) | 23.66 | 3.57 | 5.52 | 4.29  |
|                                                         | Found                    | 23.56 | 3.38 | 5.56 | 4.23  |
| H <sub>2</sub> DAB<br>Mg <sub>2</sub> (ox) <sub>3</sub> | Calc (0H <sub>2</sub> O) | 29.82 | 3.50 | 6.95 | 4.29  |
|                                                         | Found                    | 30.08 | 3.53 | 6.98 | 4.31  |

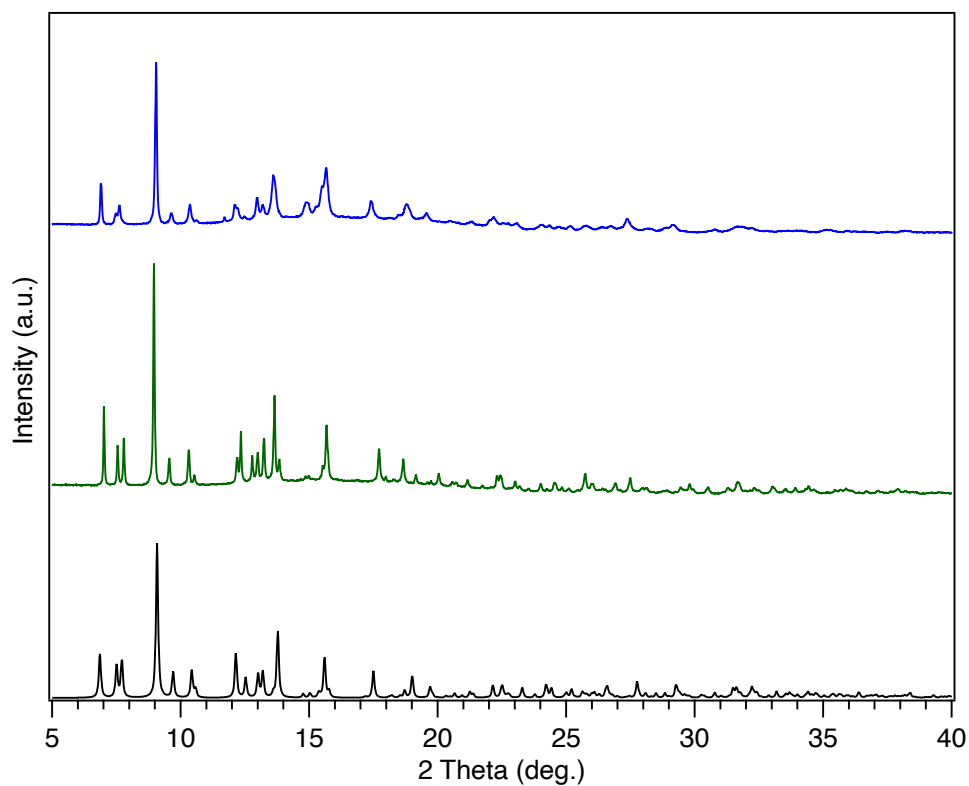

**Figure S1** H<sub>2</sub>DAB-Mg<sub>2</sub>(ox)<sub>3</sub> (blue) H<sub>2</sub>DAB-Ni<sub>2</sub>(ox)<sub>3</sub> (green) and the simulated H<sub>2</sub>DAB-Zn<sub>2</sub>(ox)<sub>3</sub> (black) at 298 K.

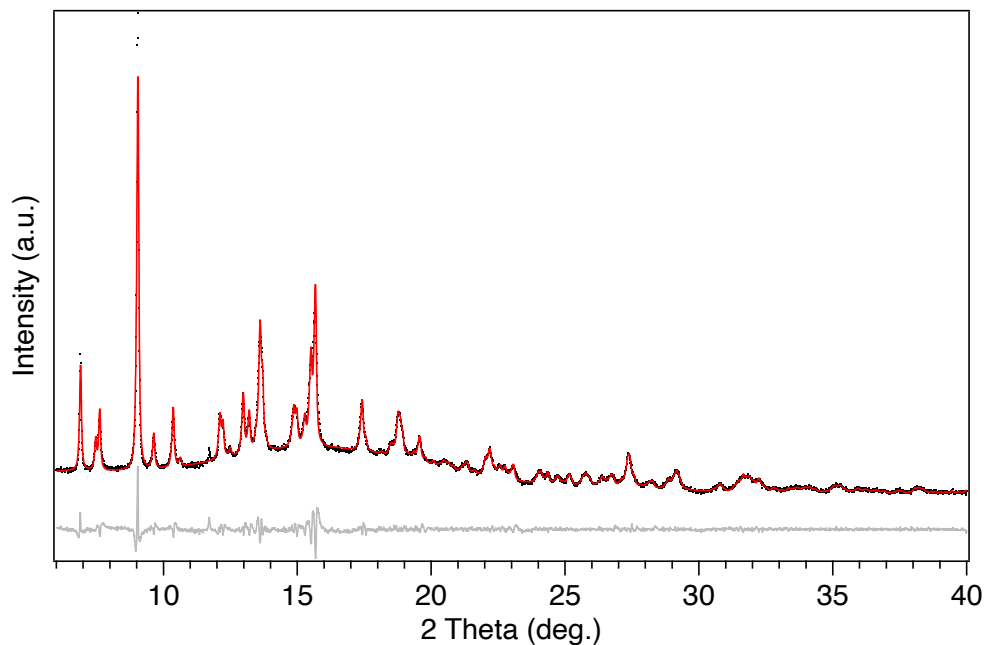

**Figure S2** Le Bail fitting (red curve) on XRPD pattern of H<sub>2</sub>DAB-Mg<sub>2</sub>(ox)<sub>3</sub> (black dots). The grey curve shows the difference between fitting curve and raw pattern. The wavelength was 1.000 Å.

**Table S2** Le Bail fitting results of H<sub>2</sub>DAB-Mg<sub>2</sub>(ox)<sub>3</sub>.

|                        |          |          |        |
|------------------------|----------|----------|--------|
| <b>Space group</b>     | P-1      |          |        |
| <i>a</i>               | 6.735 Å  | <i>α</i> | 62.60° |
| <i>b</i>               | 8.996 Å  | <i>β</i> | 88.08° |
| <i>c</i>               | 9.417 Å  | <i>γ</i> | 71.44° |
| <b>Crystal size</b>    | 93(1) nm |          |        |
| <i>R</i> <sub>wp</sub> | 3.69%    |          |        |

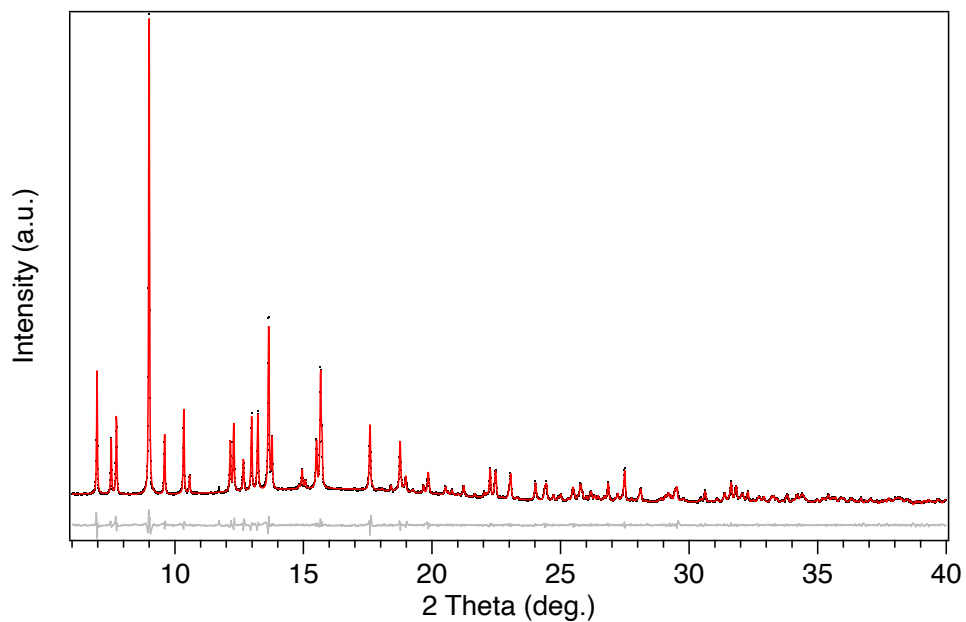

**Figure S3** Le Bail fitting (red curve) on XRPD pattern of  $\text{H}_2\text{DAB-MgNi(ox)}_3$  (black dots). The grey curve shows the difference between fitting curve and raw pattern. The wavelength was 1.000 Å.

**Table S3** Le Bail fitting results of  $\text{H}_2\text{DAB-MgNi(ox)}_3$ .

|                        |           |          |        |
|------------------------|-----------|----------|--------|
| <b>Space group</b>     | P-1       |          |        |
| <i>a</i>               | 6.801 Å   | <i>α</i> | 62.37° |
| <i>b</i>               | 8.936 Å   | <i>β</i> | 88.27° |
| <i>c</i>               | 9.375 Å   | <i>γ</i> | 71.14° |
| <b>Crystal size</b>    | 234(2) nm |          |        |
| <i>R</i> <sub>wp</sub> | 2.90%     |          |        |

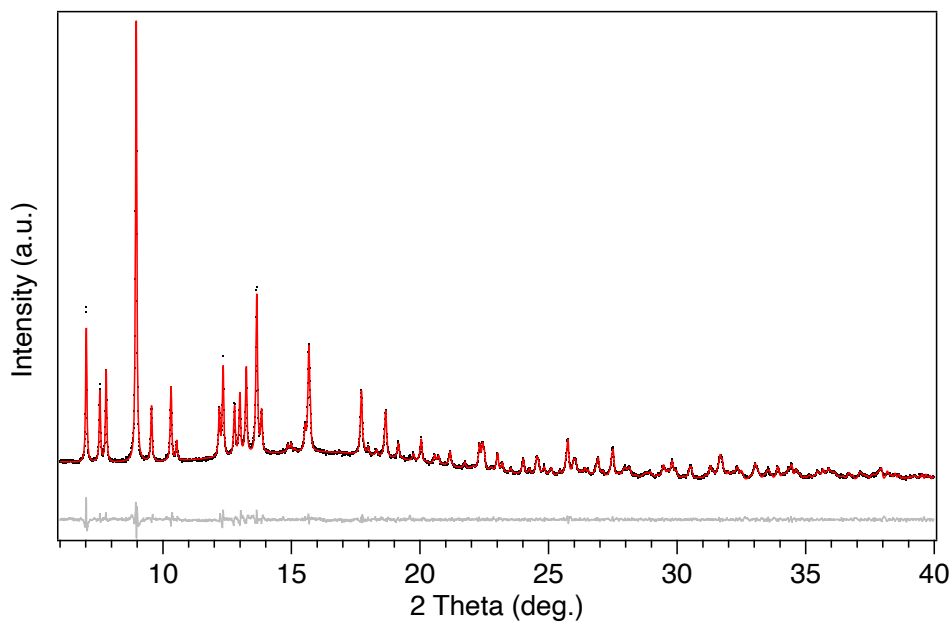

**Figure S4** Le Bail fitting (red curve) on XRPD pattern of H<sub>2</sub>DAB-Ni<sub>2</sub>(ox)<sub>3</sub> (black dots). The grey curve shows the difference between fitting curve and raw pattern. The wavelength was 1.000 Å.

**Table S4** Le Bail fitting results of H<sub>2</sub>DAB-Ni<sub>2</sub>(ox)<sub>3</sub>.

|                              |           |          |        |
|------------------------------|-----------|----------|--------|
| <b>Space group</b>           | P-1       |          |        |
| <i>a</i>                     | 6.844 Å   | <i>α</i> | 62.17° |
| <i>b</i>                     | 8.895 Å   | <i>β</i> | 88.34° |
| <i>c</i>                     | 9.327 Å   | <i>γ</i> | 70.81° |
| <b>Crystal size</b>          | 133(1) nm |          |        |
| <b><i>R</i><sub>wp</sub></b> | 2.27%     |          |        |

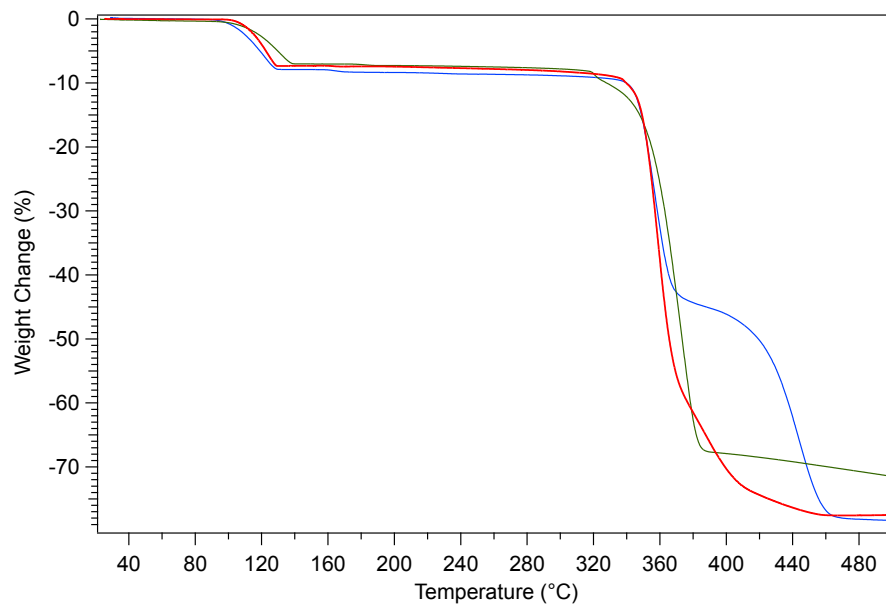

**Figure S5** Thermogravimetric analysis plots of the dried H<sub>2</sub>DAB-Mg<sub>2</sub>(ox)<sub>3</sub> (blue) H<sub>2</sub>DAB-Ni<sub>2</sub>(ox)<sub>3</sub> (green) and H<sub>2</sub>DAB-MgNi(ox)<sub>3</sub> (red). The heating rate was 5 °C / min.

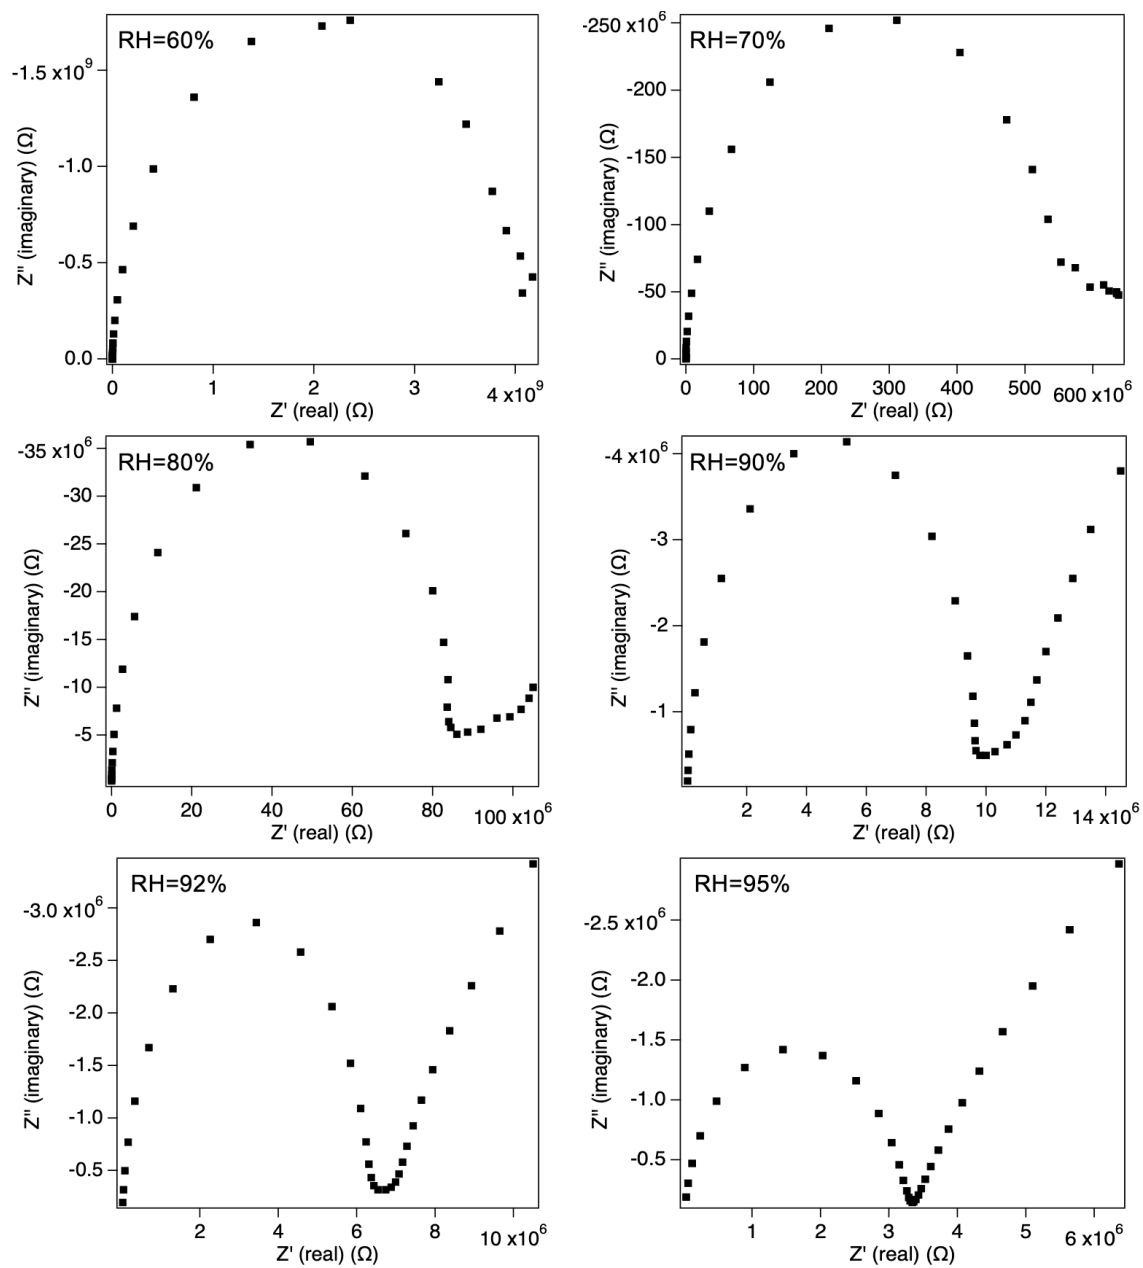

**Figure S6** Nyquist plots for  $\text{H}_2\text{DAB-Mg}_2(\text{ox})_3$  at 298 K.

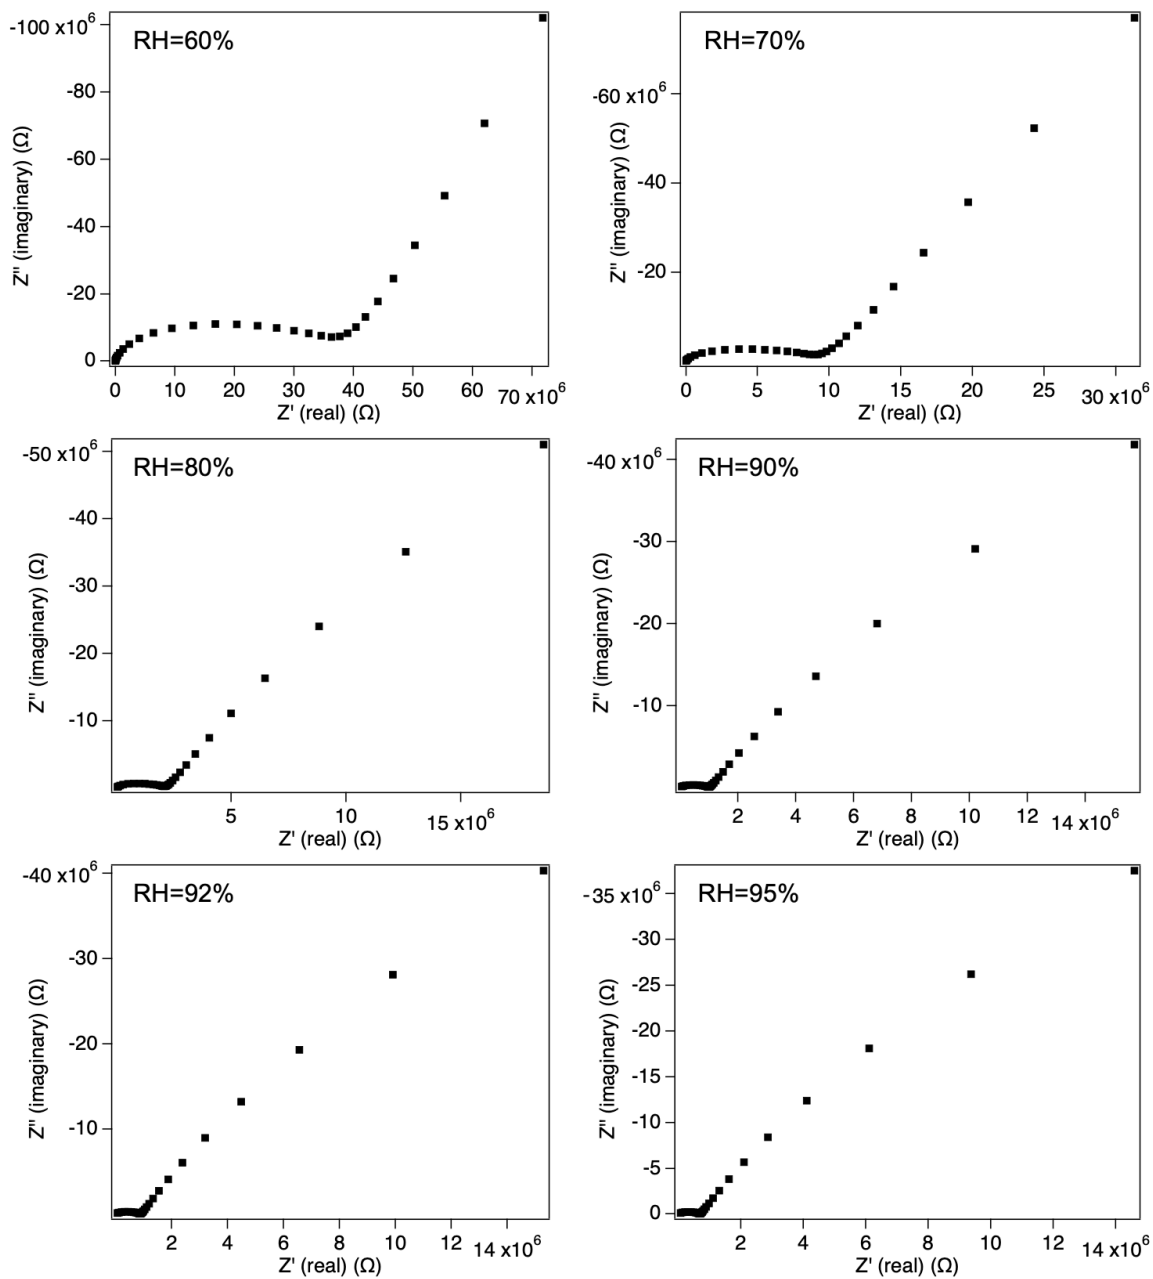

**Figure S7** Nyquist plots for  $\text{H}_2\text{DAB-MgNi(ox)}_3$  at 298 K.



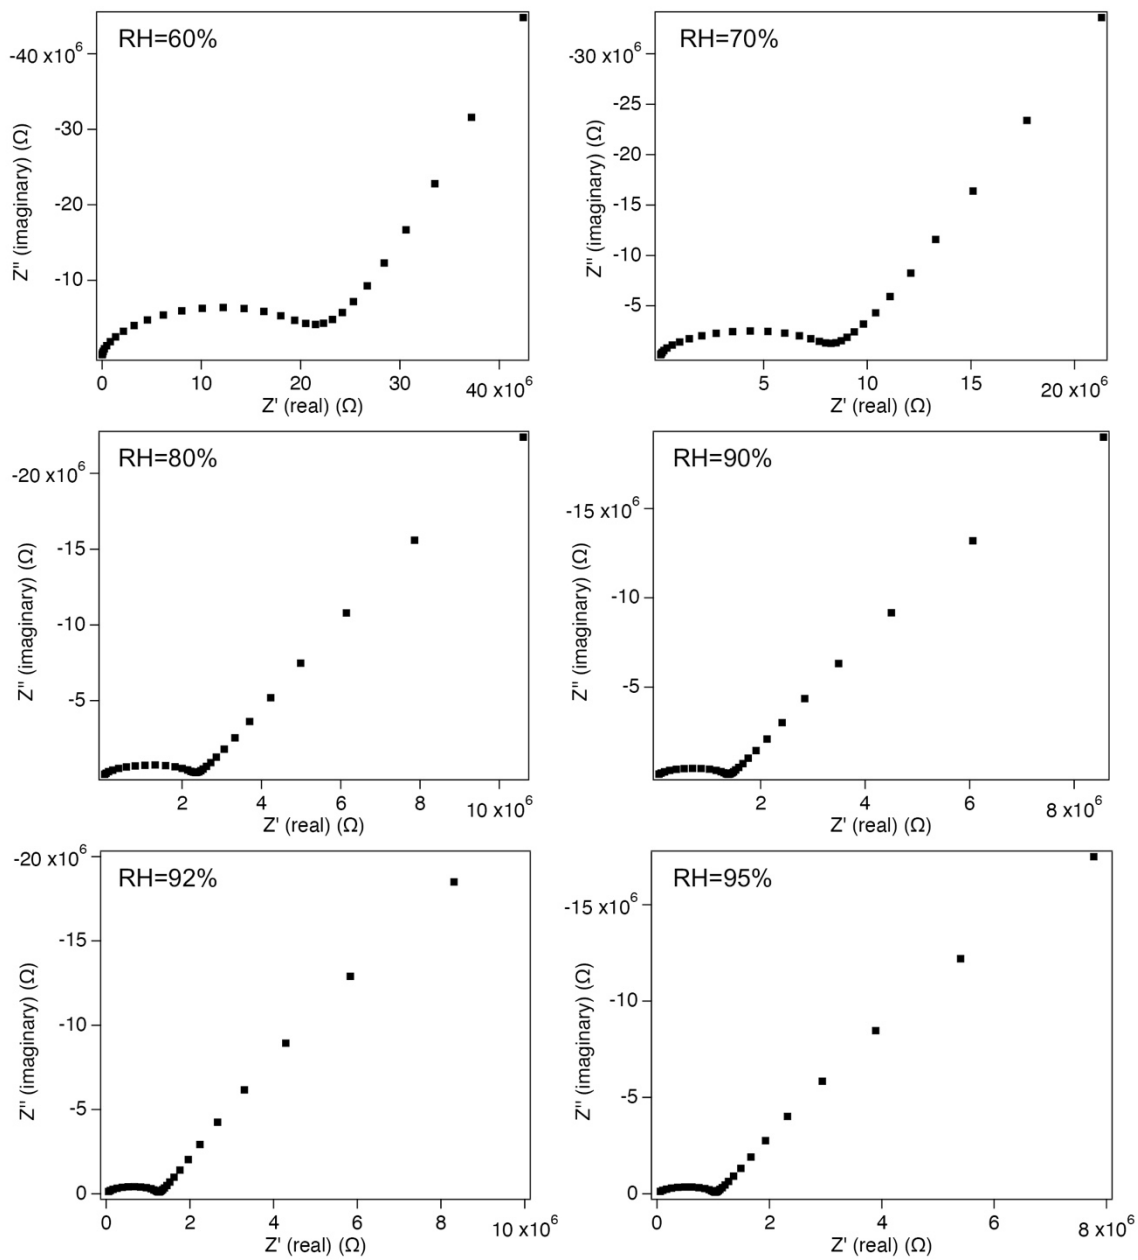

**Figure S8** Nyquist plots for  $\text{H}_2\text{DAB-Ni}_2(\text{ox})_3$  at 298 K.

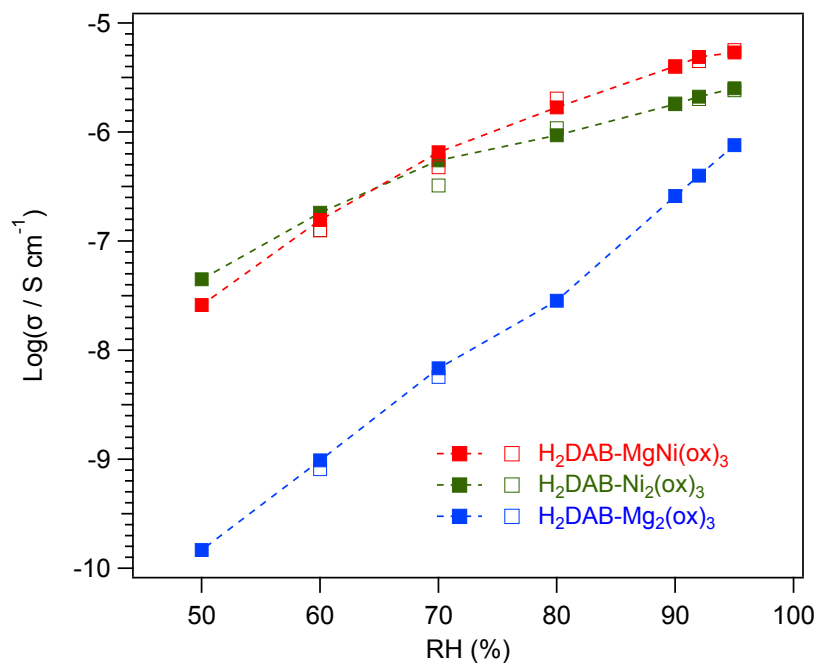

**Figure S9** Humidity dependence at RH increasing (solid) and RH decreasing (hollow) processes of proton conductivities for H<sub>2</sub>DAB-Mg<sub>2</sub>(ox)<sub>3</sub>, H<sub>2</sub>DAB-Ni<sub>2</sub>(ox)<sub>3</sub> and H<sub>2</sub>DAB-MgNi(ox)<sub>3</sub>. The measurement temperature was 298 K.
